# Supplementary material for: Circulating CD138 enhances disease progression by augmenting autoreactive antibody production in a mouse model of systemic lupus erythematosus
Source: PubMed Central journal article supplement (PMC8405997; doi:10.1016/j.jbc.2021.101053), 2021-08-06
Supplement: mmc1.pdf [file mmc1.pdf]

# **Circulating CD138 enhances disease progression by augmenting autoreactive antibody production in a mouse model of systemic lupus erythematosus**

**Lunhua Liu and Mustafa Akkoyunlu\***

*Laboratory of Bacterial Polysaccharides, Division of Bacterial Parasitic and Allergenic Products, Center for Biologics, Evaluation and Research, the US Food and Drug Administration, Silver Spring, Maryland.*

Supporting information-Figures

**Figure S1**

**A.**

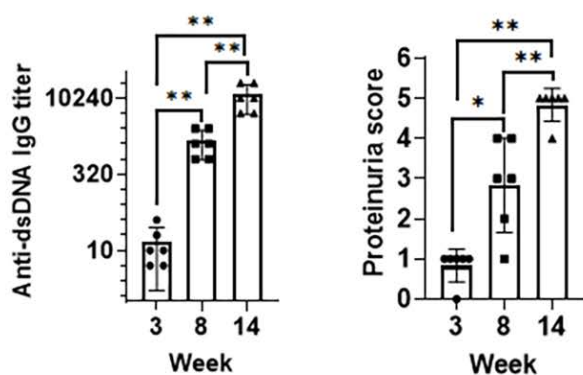

**B.**

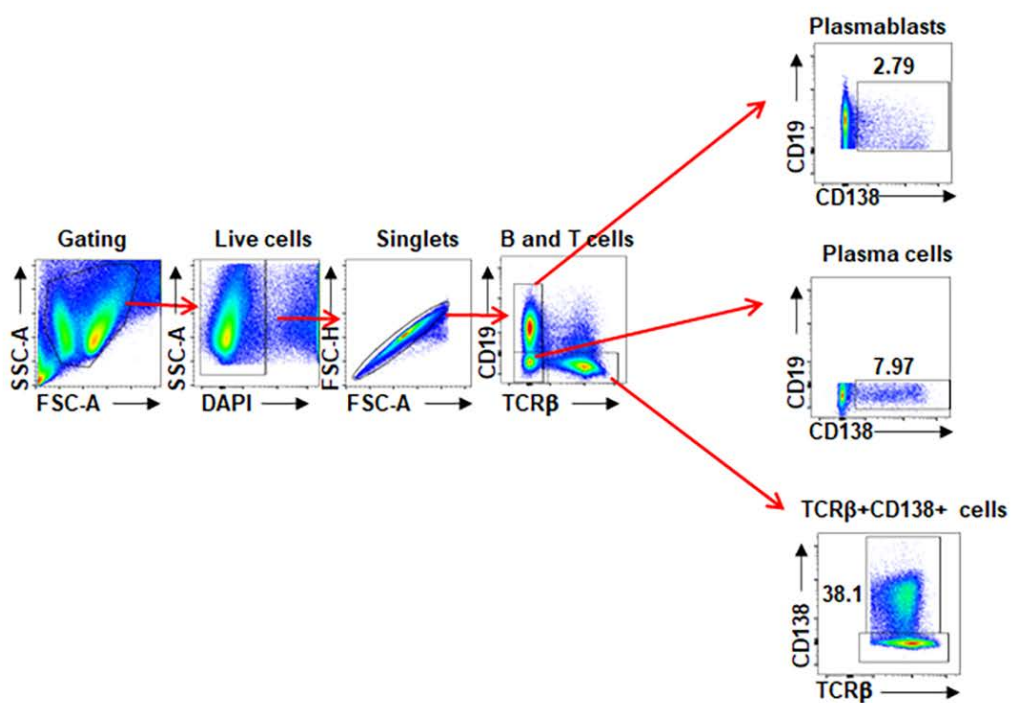

**C.**

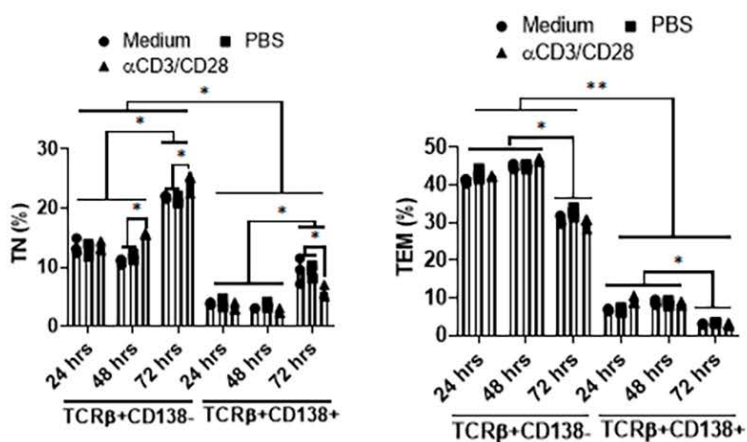

**Figure S1. Lupus disease parameters, CD138-expressing cell subsets and memory T cell frequency after stimulation.**

**A.** Serum anti-dsDNA IgG titers and proteinuria scores of MRL/Lpr mice from different ages are shown. Mean  $\pm$  SD of 6 mice from two independent experiments are plotted. **B.** Singlets and live splenocytes were analyzed by FACS using B, T and plasma cell surface markers. **C.** Purified TCR $\beta$ +CD138<sup>-</sup> and TCR $\beta$ +CD138<sup>+</sup> cells were treated with  $\alpha$ CD3/CD28 antibodies for indicated durations, and TN and TEM cell percentages were measured by FACS. Mean  $\pm$  SD of 3 mice from three independent experiments are plotted. \*p<0.05, \*\*p<0.01.

**Figure S2**

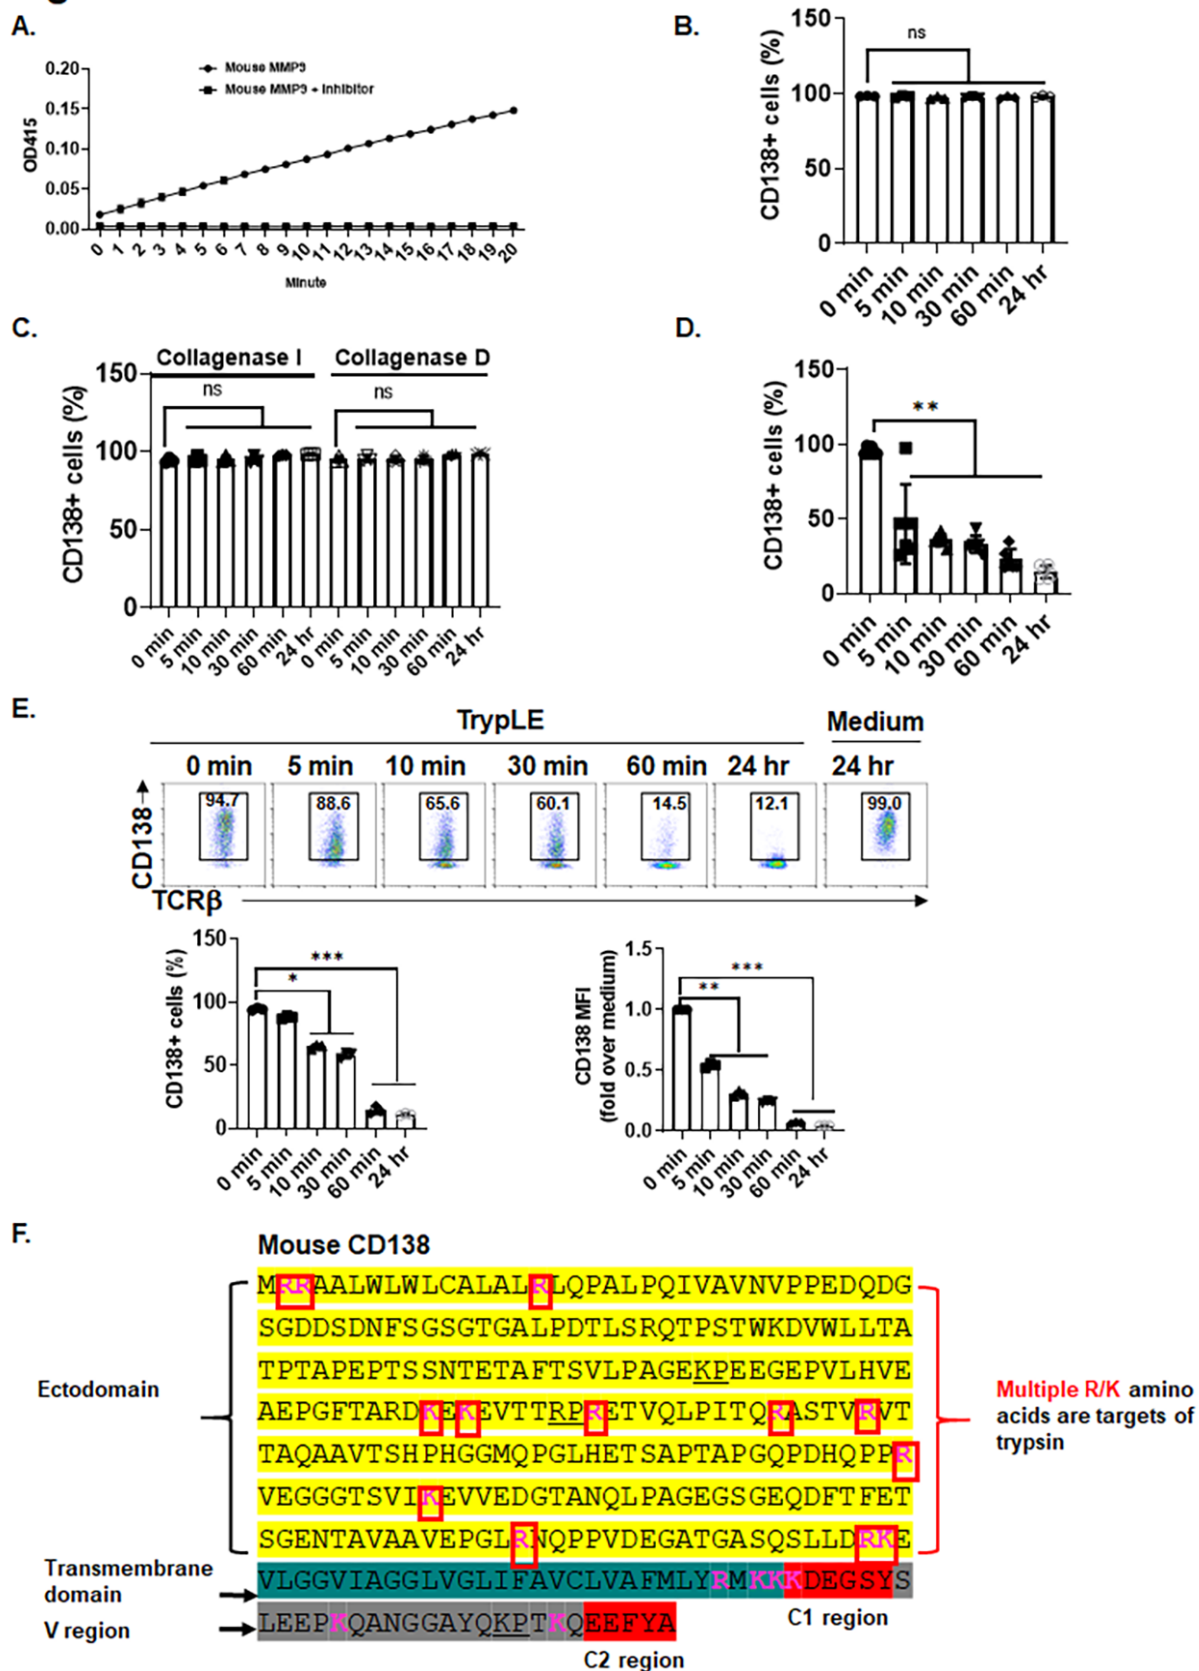

**Figure S2. CD138 on lupus T cells is resistant to MMP9 but sensitive to trypsin cleavage.**

**A.** The activity of mouse MMP9 was verified with the MMP9 colorimetric drug discovery kit using MMP9 specific inhibitor or not. Mean of two independent experiments are plotted. **B - D.** Purified TCR $\beta$ +CD138+ cells from 12 weeks old MRL/Lpr mice were treated with active MMP9 (**B**) collagenase I and D (**C**), or trypsin (**D**) for indicated durations and the percentages of CD138-expressing cells were measured by FACS. Mean  $\pm$  SD of three independent experiments are plotted. ns, not significant. **E.** Purified TCR $\beta$ +CD138+ cells from 12 weeks old MRL/Lpr mice were treated 10% TrypLE for indicated time, and CD138 positive cells percentages and CD138 expression levels were measured by FACS. Mean  $\pm$  SD of three independent experiments are plotted. **F.** Extracellular, transmembrane, and intracellular domains of murine CD138 were labeled with yellow, turquoise, and green colors, respectively. The trypsin targets, lysine (R) and arginine (K) amino acids in the extracellular domain are highlighted in red box. Lysine and arginine residues in the transmembrane and intracellular domain are highlighted with pink color. \*p<0.01, \*\*p<0.01, \*\*\*p<0.001.

**Figure S3**

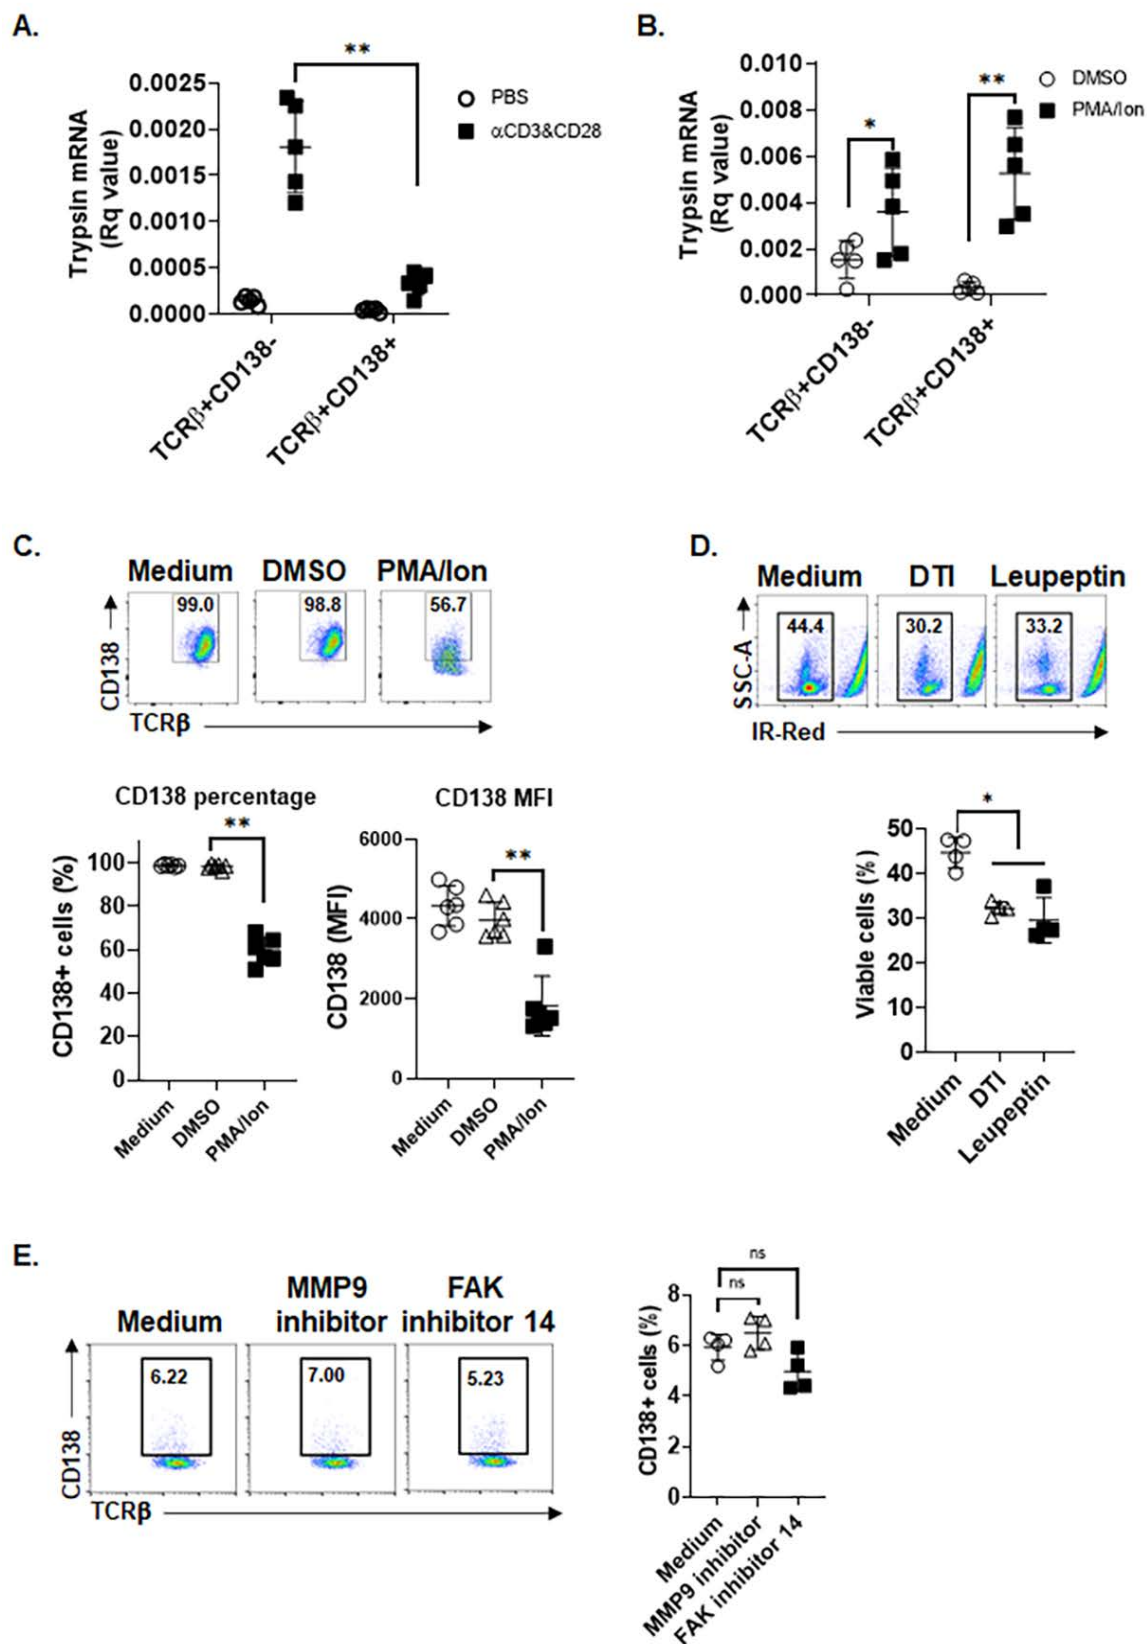

**Figure S3. Trypsin expression is increased in activated T cells.**

**A - C**, purified TCR $\beta$ +CD138+ and TCR $\beta$ +CD138- cells from 10 to 12 weeks old MRL/Lpr mice were treated with  $\alpha$ CD3/CD28 antibodies (**A**) or PMA and Ionomycin (PMA/Ion) (**B**) for 48 hours, and then trypsin mRNA levels were measured by Q-PCR or surface CD138 expression (**C**) was measured by FACS. Mean  $\pm$  SD of five to six different samples are plotted. **D**, purified TCR $\beta$ +CD138- cells from 10 to 12 weeks old MRL/Lpr mice were cultured in serum free medium or treated with trypsin inhibitors DTI and Leupeptin for 24 hours, after which cell-survival was measured by FACS. Mean  $\pm$  SD of four different samples are plotted. **E**, Purified TCR $\beta$ +CD138- cells from 10 to 12 weeks old MRL/Lpr mice were cultured in serum free medium or treated with MMP9 specific inhibitor APMA and FAK inhibitor 14 for 24 hours, after which CD138+ cells were measured by FACS. Mean  $\pm$  SD of four different samples are plotted. ns, not significant. \* $p$ <0.05, \*\* $p$ <0.01.

**Figure S4**

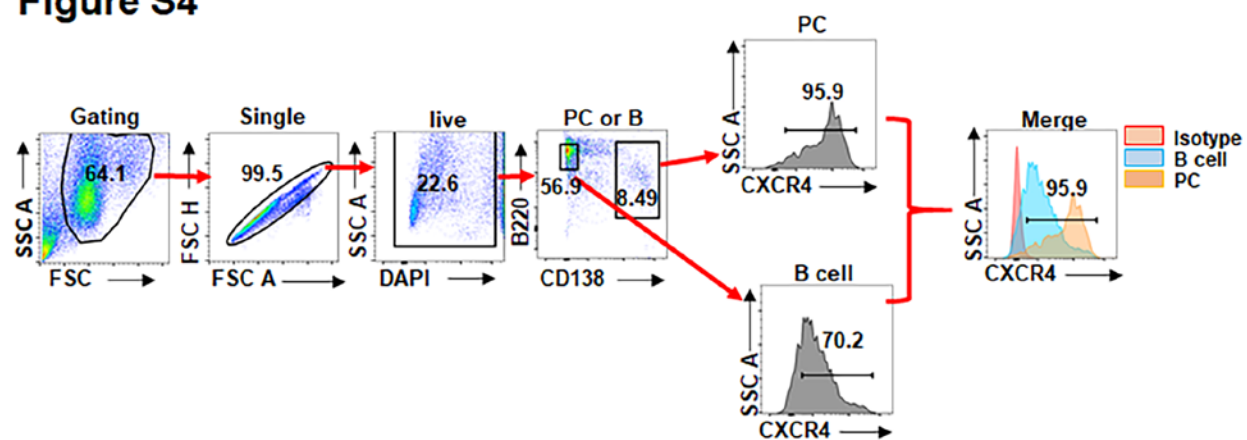



**Figure S4. Gating strategy for measuring CXCR4 on plasma cells and B cells.**

The singlet and live cells were gated before staining with B220 and CD138 antibodies in FACS. Expression of CXCR4 on plasma cells and B cells were for further analyzed by FACS.

**Figure S5**

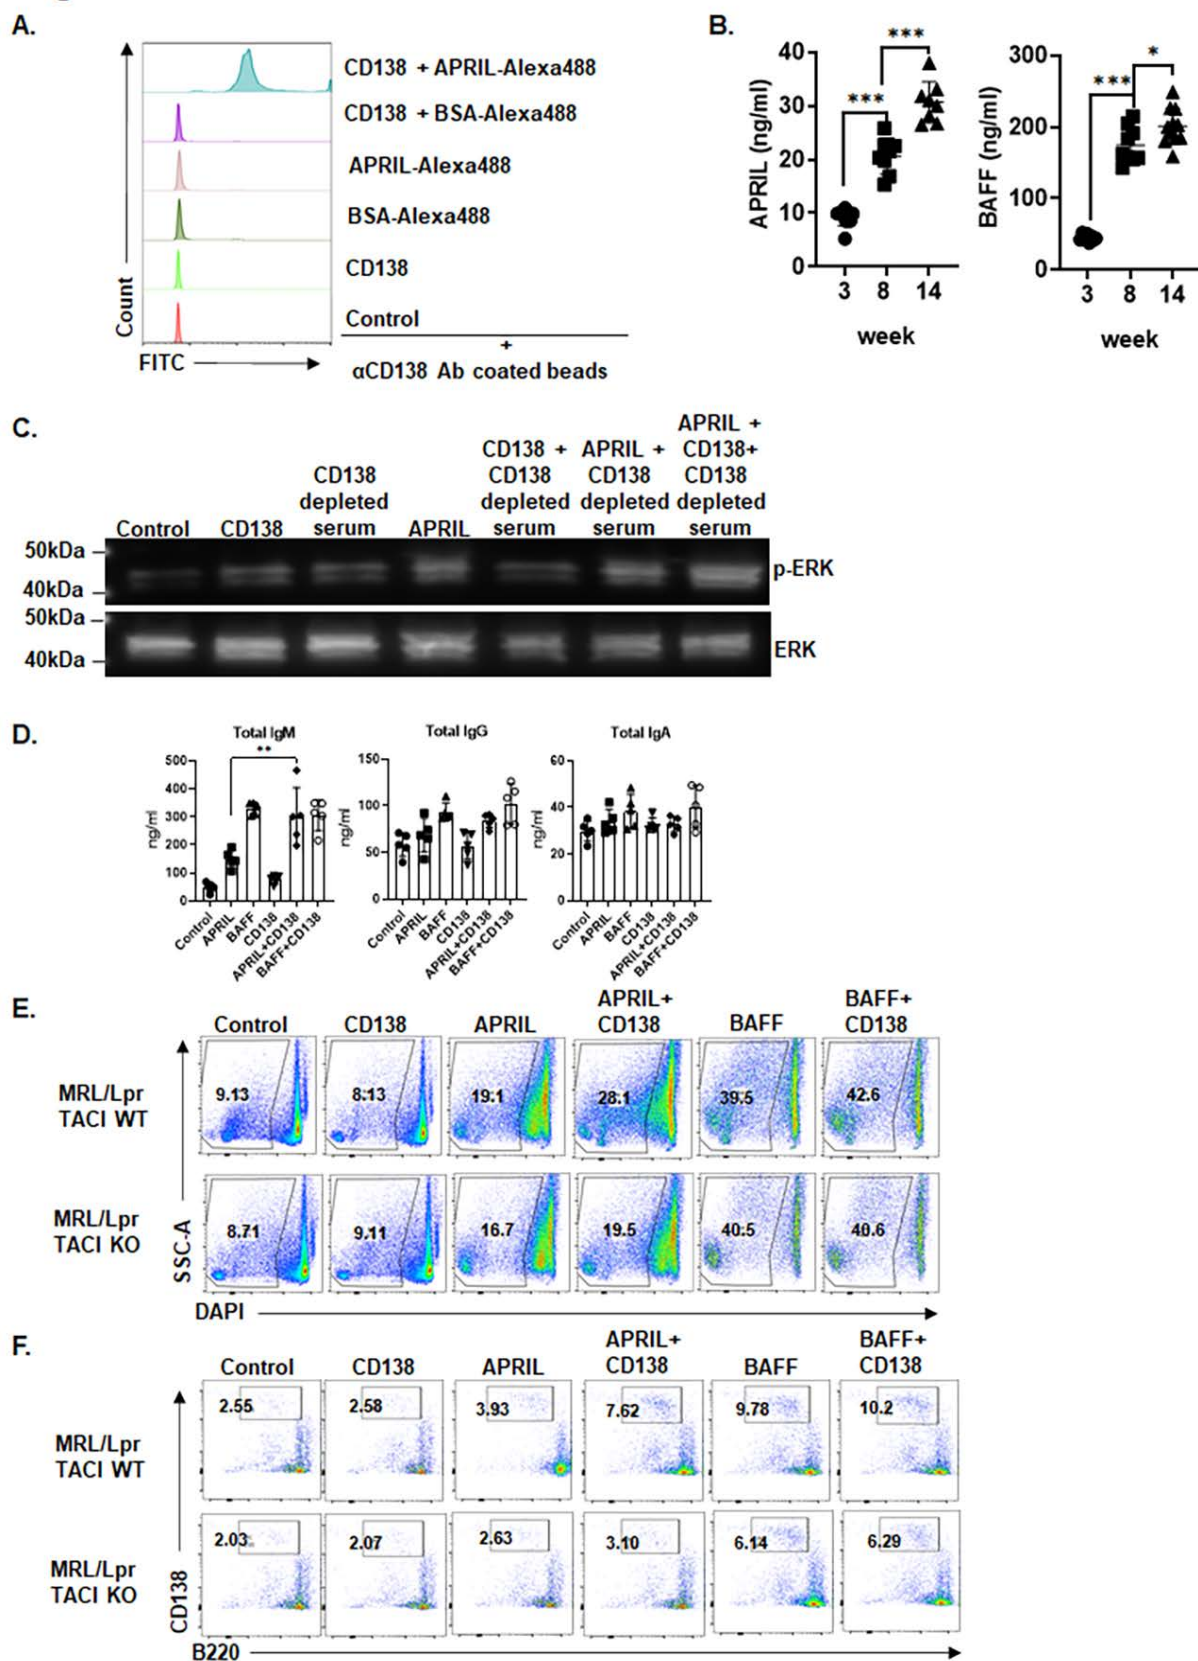

**Figure S5. CD138 interacts with APRIL and enhances APRIL-induced ERK phosphorylation and B cell survival through TACI.**

**A**, protein A and G Sepharose beads were coated with anti-CD138 antibody first, and then incubated with soluble CD138, BSA-Alexa 488 or APRIL-Alexa488 alone or in combination. After incubation at room temperature for 1 hour while shaking, beads were washed and subjected to FACS analysis. Histogram images from one representative experiment out of three independent experiments are shown. **B**, sera were collected from MRL/Lpr mice at different ages and the serum APRIL and BAFF levels were measured by ELISA. Mean  $\pm$  SD of 8 to 11 different samples are plotted. **C**, MRL/Lpr B cells were left in 2% FBS or treated with CD138, CD138 depleted serum, APRIL alone, CD138 plus CD138 depleted serum, CD138 depleted serum plus APRIL or CD138 plus CD138 depleted serum plus APRIL for overnight and ERK phosphorylation was detected with Western Blot analysis. **D**, MRL/Lpr B cells were treated with APRIL, BAFF, CD138, APRIL plus CD138 or BAFF plus CD138 for 5 days, and culture supernatant total IgM, IgG and IgA antibody levels were quantified in ELISA. Mean  $\pm$  SD of four independent experiments are plotted. **E**, B cells isolated from MRL/Lpr TACI WT and MRL/Lpr TACI KO mice were cultured in 10% FBS and treated with CD138, APRIL, APRIL plus CD138, BAFF or BAFF plus CD138 for 5 days, and B cell survival was measured with FACS analysis. Representative images from six independent experiments are shown. **F**, B cells isolated from MRL/Lpr TACI WT and MRL/Lpr TACI KO mice were cultured in 10% FBS and treated with CD138, APRIL, APRIL plus CD138, BAFF or BAFF plus CD138 for 5 days, and plasma cell formation was measured with FACS analysis. Representative images from six independent experiments are shown. \* $p < 0.05$ , \*\* $p < 0.01$ , \*\*\* $p < 0.001$ .
